# Supplementary material for: The efficacy of analgesics in controlling orthodontic pain: a systematic review and meta-analysis
Source: Springer Nature journal article supplement (doi:10.1186/s12903-020-01245-w), 2020-09-18

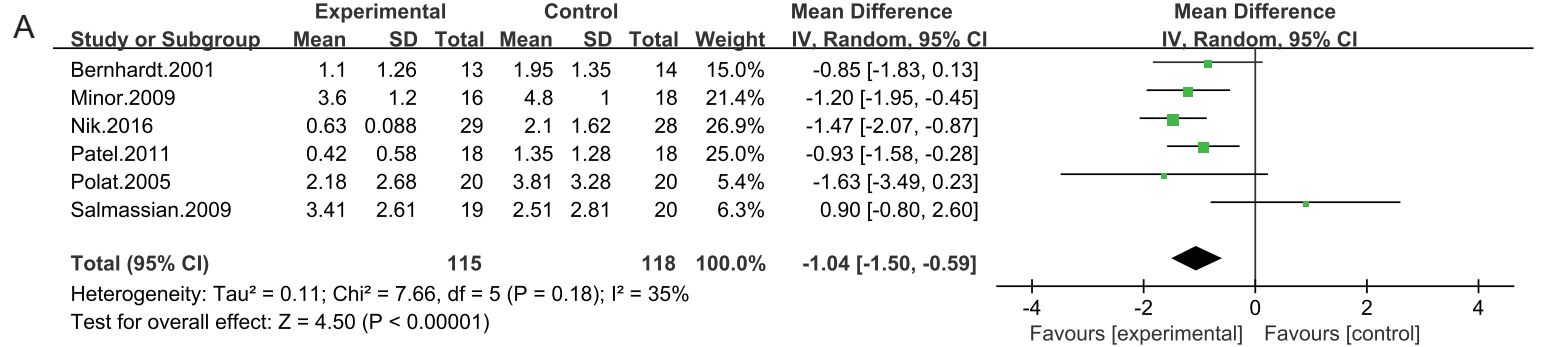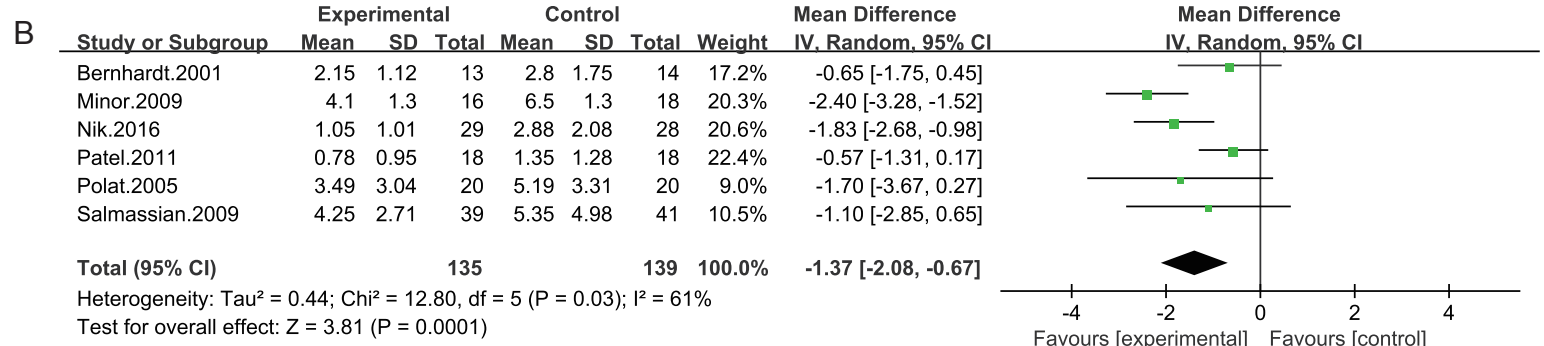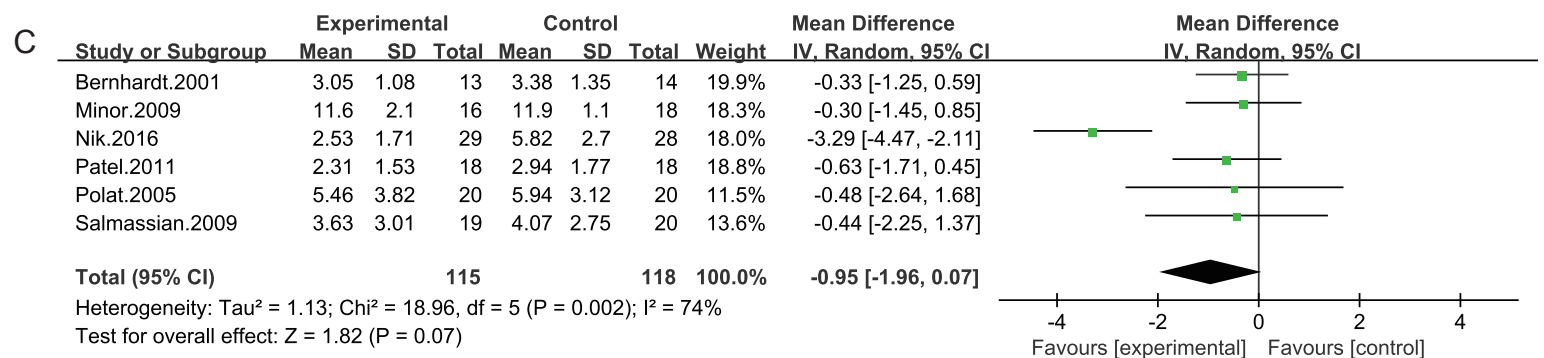

Supplement: MOESM1 [file 18394310]
